# Supplementary material for: Hybridized sulfated-carboxymethyl cellulose/MWNT nanocomposite as highly selective electrochemical probe for trace detection of arsenic in real environmental samples
Source: Royal Society of Chemistry journal article supplement (doi:10.1039/d3ra03808d), 2023-01-01
Supplement: d3ra03808d1.pdf [file d3ra03808d1.pdf]

1 **Hybridized sulfated-carboxymethyl cellulose/MWNT nanocomposite as high-selective**  
2 **electrochemical probe for trace detection of arsenic in Real Environmental Samples**

3 Youssef O. Al-Ghamdi<sup>a,\*</sup>, Mahjoub Jabli<sup>a</sup>, Mona H.Alhalafi<sup>a</sup>, Ajahar Khan<sup>b,\*\*</sup>, Khalid A.  
4 Alamry<sup>c,\*\*\*</sup>

5 <sup>a</sup>Department of Chemistry, College of Science Al-Zulfi, Majmaah University, Al-Majmaah  
6 11952, Saudi Arabia

7 <sup>b</sup>Chemistry Department, Faculty of Science, King Abdulaziz University, Jeddah 21589, Saudi  
8 Arabia

9 <sup>c</sup>Department of Food and Nutrition, Bionanocomposite Research Center, Kyung Hee University,  
10 26 Kyungheedaero-ro, Dongdaemun-gu, Seoul, South Korea

11  
12 *\*Corresponding Author.*

13 *\*\*Corresponding Author.*

14 *\*\*\*Corresponding Author.*

15 **E-mail addresses:** yo.alghamdi@mu.edu.sa (Youssef.O.Al-Ghamdi), arkhan.029@gmail.com  
16 (Ajahar Khan), kaalamri@kau.edu.sa (K.A.Alamry)

17  
18 **Supporting Information**

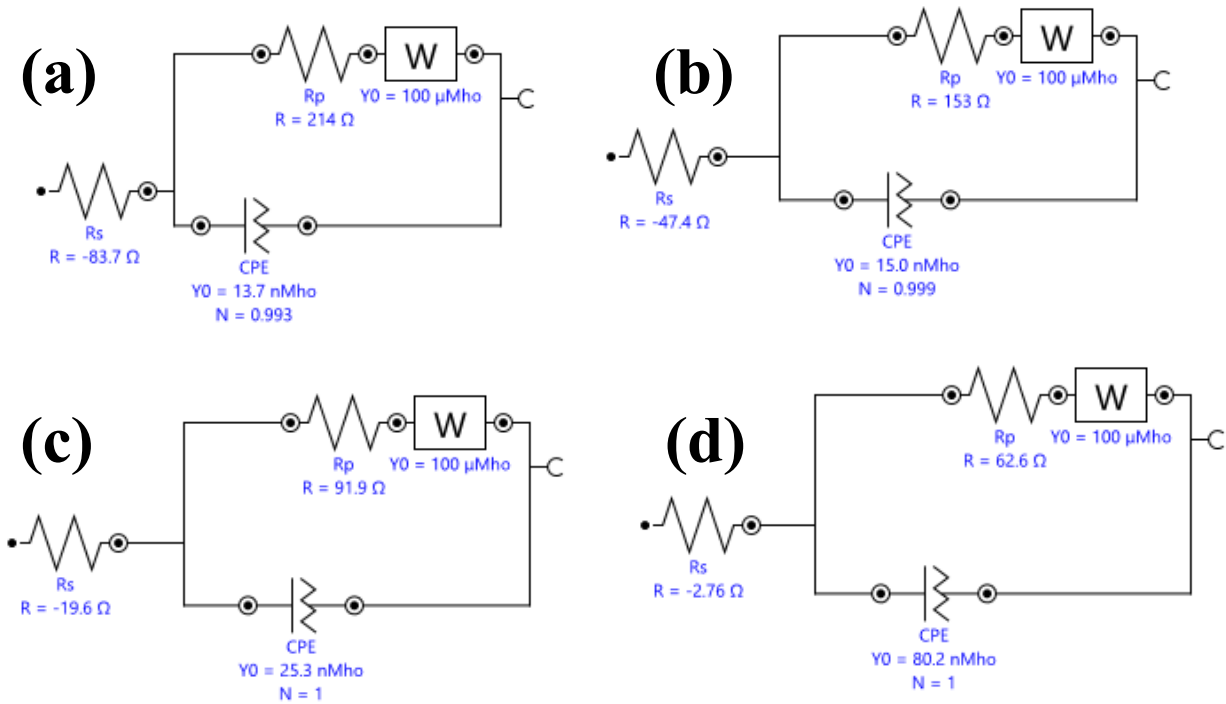

20

21 **Fig. S1** Equivalent circuit models for (a) blank, (b) CMC-S@GCE, (c) CMC-S/MWMNT<sup>1</sup>@GCE,  
 22 and (d) CMC-S/MWMNT<sup>2</sup>@GCE showing charge transfer resistance ( $R_p=R_{ct}$ ), solution  
 23 resistance ( $R_s$ ), W-Warburg impedance, and CPE-constant phase element.

24

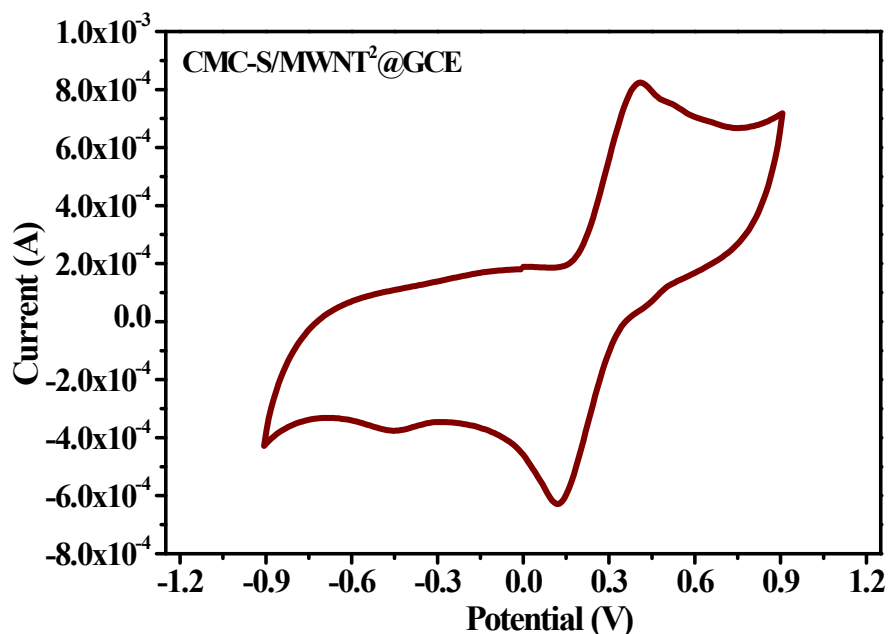

25

26 **Fig. S2.** CV hysteresis curve of CMC-S/MWNT<sup>2</sup>@GCE in the presence of [Fe(CN)<sub>6</sub>]<sup>3-/4-</sup> (0.5  
 27 mM)couple/ KCl(0.1 M) at scan rate=100 mV s<sup>-1</sup>.

28

29

30 **S3.1 Limit of Detection (LOD) of the CMC-S/MWNT<sup>2</sup>@GCE probe**

31 
$$LOD = \frac{3 \times SD}{b}$$

32 where S represents the standard deviation of the blank response, and b represents the Slope of the  
 33 calibration plot.

34  $SD = 1.8319 \times 10^{-8}$

35  $b = 2.21 \times 10^{-6}$

36  $LOD = 0.0248 \pm 4.3 \times 10^{-4} \text{ nM}$

37

38 **S3.2 Limit of Quantification (LOQ) of the CMC-S/MWNT<sup>2</sup>@GCE probe**

39  $LOQ = \frac{10 \times SD}{b}$

40  $LOQ = 10 \times 1.8319 \times 10^{-8} / 2.21 \times 10^{-6} \text{ nM}$

41  $LOQ = 0.0828 \pm 1.5 \times 10^{-4} \text{ nM}$

42

### 43 **S3.3 Sensitivity of the CMC-S/MWNT<sup>2</sup>@GCE probe**

44  $Sensitivity = \frac{\text{Slope of calibration plot}}{\text{Surface area of GCE}}$

45 Slope of calibration plot =  $2.21 \times 10^{-6} \text{ AnM}^{-1}$

46 Surface area of electrode =  $0.0316 \text{ cm}^2$

47 Calculated sensitivity =  $69.93 \pm 7.9 \times 10^{-2} \mu\text{AnM}^{-1}\text{cm}^{-2}$

48

### 49 **S4: Statistical Analysis**

#### 50 **S4.1 Interferents Effect**

51 Stripping peak current response (A): 0.000346272, 0.00033889, 0.000329784, 0.000328084,

52 0.000318594, 0.00031806, 0.000318098, 0.00031544, 0.000314143, 0.000310162, and

53 0.000310101.

54 Mean = 0.00032251

55 Standard deviation =  $2.04029 \times 10^{-5}$

56

57  $Relative\ standard\ deviation\ \% (RSD) = \frac{\text{Standard deviation}}{X (\text{mean value})} \times 100$

58

59  $RSD(\%) = 6.32$

60

#### 61 S4.2 Stability over a period of 28 days

62 Stripping peak current response (A): 0.000366997, 0.000346273, 0.000337889, 0.000329802, and  
63 0.000310203.

64 Mean= 0.00033823

65 Standard deviation =  $2.091 \times 10^{-5}$

66 RSD(%) = 6.18

67 Drop of current (%) = 15.48

68

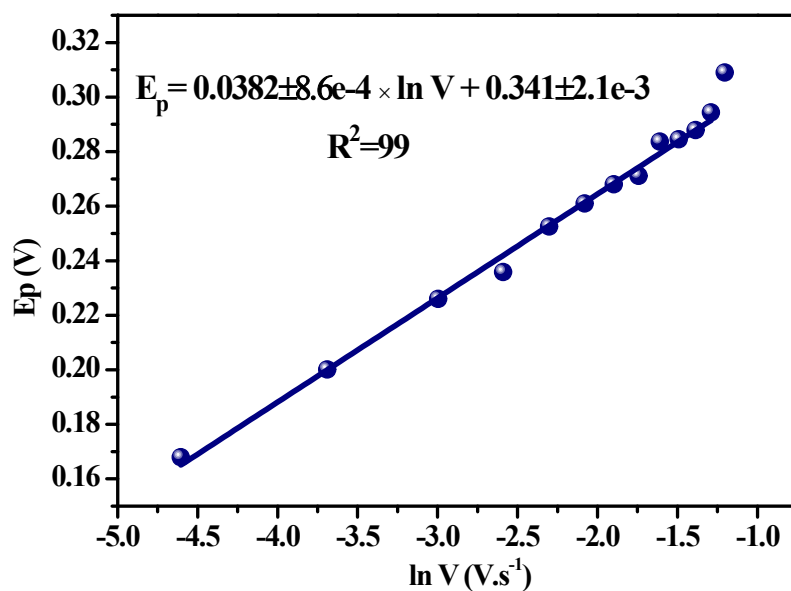

69

70 **Fig. S3.** Plot of peak potential ( $E_p$ ) against the logarithm of scan rate ( $\ln v$ ) for 0.1 mM As (III) at  
71 CMC-S/MWNT2@-GCE in 0.1 M PBS of pH 5.7.

72

73

#### 74 S5. Amperometric response

75 Response time was examined in a solution of 0.1 M PBS 5.7, including 0.1 mM As(III), to show  
76 the accumulation time. A quick response time of CMC-S/MWNT<sup>2</sup>@-GCE was found (**Fig. S4**),  
77 proving that steady-state current was reached in less than 20 s. The amount of time that it takes to  
78 reach steady-state current can be used to describe response time. Therefore, the proposed modified  
79 GCE is suggested to be useful, particularly for in-situ analysis.

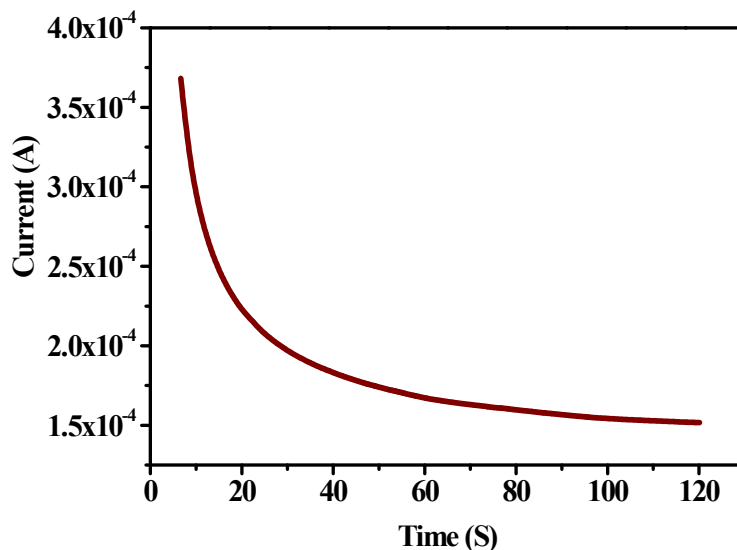

80

81 **Fig. S4.** Response time CMC-S/MWNT<sup>2</sup>@-GCE in the presence of As(III).

82

### 83 **S6. CV response at different concentration**

84 The stripping current response of CMC-S/MWNT<sup>2</sup>@-GCE towards As (III) in PBS was also  
85 investigated by recording CV response between  $\pm 0.9$  V at 0.1 Vs<sup>-1</sup> (**Fig S5**). The CMC-  
86 S/MWNT<sup>2</sup>@-GCE shows a high response towards As(III). I-V hysteresis voltammograms result  
87 suggested that the peak current value escalated with the As(III) concentration increase.

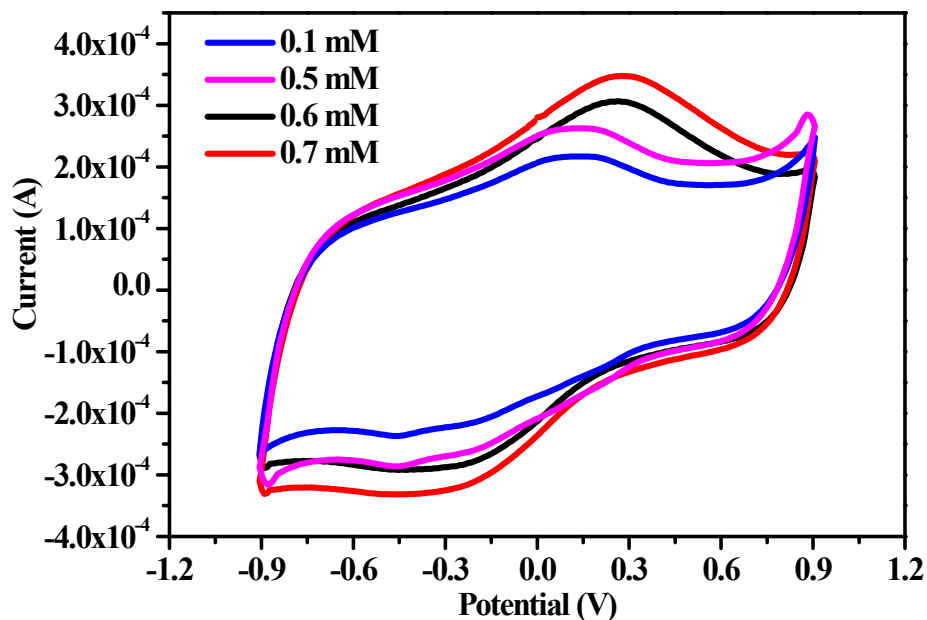

88

89 **Fig. S5.** CV response of CMC-S/MWNT<sup>2</sup>@-GCE in the presence of 0.1, 0.5, 0.6, 0.7 mM As(III).

90

91 **Table S1.** Comparison of electrochemical sensing performance of CMC-S/MWNT<sup>2</sup>@GCE with  
 92 various previously reported modified electrodes toward As(III)

93

| S.No. | Modified GCE                                                          | Analytical technique | LOD (nM) | LDR (nM)    | Ref          |
|-------|-----------------------------------------------------------------------|----------------------|----------|-------------|--------------|
| 1     | (Fe <sub>3</sub> O <sub>4</sub> -Ag/Au hollow-nanoshell-rGO nanosheet | CV                   | 0.05     | 0.50-101.09 | <sup>1</sup> |
| 2     | Pt-nanoparticle/GCE                                                   | SWASV                | 28       | 100-500     | <sup>2</sup> |
| 3     | Au-nanoparticles/GCE                                                  | SWASV                | 2.0      | 130-16000.1 | <sup>3</sup> |
| 4     | Amino-functionalized graphene oxide NH <sub>2</sub> -GO               | SWASV                | 8.97     | 5.05-50.54  | <sup>4</sup> |
| 5     | Reduced graphene oxide-magnetic nanocomposite                         | DPASV                | 0.51     | 10.1-1516.4 | <sup>5</sup> |

|    |                                                                  |       |                 |              |           |
|----|------------------------------------------------------------------|-------|-----------------|--------------|-----------|
|    | (rGO-Fe <sub>3</sub> O <sub>4</sub> )                            |       |                 |              |           |
| 6  | Co nanoparticles and reduced graphene oxide (CO-rGO)             | SWASV | 1.56            | 0.51-252.73  | 6         |
| 7  | Reduced graphene oxide /Fe <sub>3</sub> O <sub>4</sub> composite | SWASV | 1.51            | 10.1-101.09  | 7         |
| 8  | Silver nanoparticle-graphene oxide (AgNPs-GO)                    | SWASV | 0.24            | 13.33-375.19 | 8         |
| 9  | Graphene-platinum nanocomposite (Gr-nPt)                         | SWASV | 10-100          | 1.1          | 9         |
| 10 | Au-reduced graphene oxide (Au/rGO)                               | ASLSV | 2.31–<br>153.95 | 0.76         | 10        |
| 11 | Poly(3,4-ethylenedioxythiophene) /Pd nanoparticles/GCE           | DPASV | 7.0             | 10-160       | 11        |
| 12 | CMC-S/MWNT <sup>2</sup> @GCE                                     | DPV   | 0.024           | 0.05-90      | This work |

94 Differential pulse anodic stripping voltammetry (DPASV); square wave anodic stripping  
95 voltammeter (SWASV); anodic stripping linear sweep voltammetry (ASLSV)

96

## 97 References

98 1 Z. Zhao, C. Li and H. Wu, *Microchim. Acta*, 2019, **186**, 226.

99 2 X. Dai and R. G. Compton, *Analyst*, 2006, **131**, 516.

100 3 A. O. Idris, N. Mabuba and O. A. Arotiba, *Int. J. Electrochem. Sci.*, 2017, **12**, 10–21.

101 4 M. Yang, T.-J. Jiang, Y. Wang, J.-H. Liu, L.-N. Li, X. Chen and X.-J. Huang, *Sensors  
102 Actuators B Chem.*, 2017, **245**, 230–237.



- 103 5 A. B. Chimezie, R. Hajian, N. A. Yusof, P. M. Woi and N. Shams, *J. Electroanal. Chem.*,  
104 2017, **796**, 33–42.
- 105 6 A. Jimana, *Int. J. Electrochem. Sci.*, 2018, 10127–10140.
- 106 7 Z. Xie, J. Xu, F. Xie and S. Xiong, *Anal. Sci.*, 2016, **32**, 1053–1058.
- 107 8 R. A. Dar, N. G. Khare, D. P. Cole, S. P. Karna and A. K. Srivastava, *RSC Adv.*, 2014, **4**,  
108 14432–14440.
- 109 9 R. Kempegowda, D. Antony and P. Malingappa, *Int. J. Smart Nano Mater.*, 2014, **5**, 17–  
110 32.
- 111 10 W.-W. Li, F.-Y. Kong, J.-Y. Wang, Z.-D. Chen, H.-L. Fang and W. Wang, *Electrochim.*  
112 *Acta*, 2015, **157**, 183–190.
- 113 11 S. Dash and N. Munichandraiah, *Analyst*, 2014, **139**, 1789–1795.
